# Supplementary material for: Hofmeister effects of ionic liquids in protein crystallization: Direct and water-mediated interactions
Source: Royal Society of Chemistry journal article supplement (doi:10.1039/c2ce25129a), 2012-01-01
Supplement: c2ce25129a.pdf [file c2ce25129a.pdf]

## Electronic Supplementary Information

### Hofmeister effects of ionic liquids in protein crystallization: direct and water-mediated interactions

Magdalena Kowacz<sup>\*a</sup>, Abhik Mukhopadhyay<sup>b</sup>, Ana Luísa Carvalho<sup>b</sup>, José M. S. S. Esperança<sup>a</sup>,  
Maria J. Romão<sup>b</sup>, Luís Paulo N. Rebelo<sup>\*a</sup>

<sup>a</sup>Instituto de Tecnologia Química e Biológica, Universidade Nova de Lisboa, Av. da República,  
2780-157 Oeiras, Portugal

<sup>b</sup>REQUIMTE, Departamento de Química, Faculdade de Ciências e Tecnologia, Universidade  
Nova de Lisboa, 2829-516 Caparica, Portugal

\*magda@itqb.un.pt; luis.rebelo@itqb.unl.pt

Table S1. Details of data collection statistics for lysozyme

| Dataset                                                 | Lysozyme – [Ch][Ac]                 |
|---------------------------------------------------------|-------------------------------------|
| X-ray source                                            | Soleil (Proxima I)                  |
| <b>Crystal data</b>                                     |                                     |
| Unit cell parameters (Å)                                | $a=78.35$<br>$b=78.35$<br>$c=36.90$ |
| Space group                                             | $P4_32_12$                          |
| Molecules per ASU                                       | 1                                   |
| Mosaicity                                               | 0.28                                |
| Matthews coefficient (Å <sup>3</sup> Da <sup>-1</sup> ) | 1.98                                |
| Solvent content (%)                                     | 38.01                               |

|                                       |                          |
|---------------------------------------|--------------------------|
| Max. resolution (Å)                   | 1.50                     |
| <b>Data collection and processing</b> |                          |
| Resolution limits (Å)                 | 39.17-1.50 (1.51 – 1.50) |
| Wavelength (Å)                        | 0.8856                   |
| No. of observed reflections           | 132855 (19918)           |
| No. of unique reflections             | 20915 (3118)             |
| $R_{\text{sym}}$                      | 5.8 (60.0)               |
| $R_{\text{meas}}$                     | 6.2 (62.0)               |
| $R_{\text{mrgd-F}}$                   | 11.6 (50.9)              |
| Completeness (%)                      | 99.6 (100)               |
| $\langle I/\sigma \rangle$            | 19.33 (3.19)             |
| <b>Refinement statistics</b>          |                          |
| Resolution (Å)                        | 30.17-1.50               |
| Reflections used                      | 17978                    |
| $R_{\text{work}}$ (%)                 | 16.75                    |
| $R_{\text{free}}^a$ (%)               | 21.09                    |
| Number of water molecules             | 172                      |
| Temperature factors (Å <sup>2</sup> ) |                          |
| Average for protein atoms             | 18.04                    |
| Average for choline                   | 33.27                    |
| Average for acetate                   | 33.53                    |
| Average for solvent                   | 33.15                    |

|                                      |      |
|--------------------------------------|------|
| Ramachandran plot:                   |      |
| Residues other than Gly and Pro in : |      |
| Most favored regions (number)        | 125  |
| Additional allowed regions (number)) | 4    |
| Disallowed regions (number)          | 0    |
| PDB code                             | 4AGA |

Table S2. Data collection and refinement statistics for Ribonuclease A

| Dataset                                                 | Ribonuclease                        |
|---------------------------------------------------------|-------------------------------------|
| Xray source                                             | Soleil (Proxima I)                  |
| <b>Crystal data</b>                                     |                                     |
| Unit cell parameters (Å) (°)                            | $A=64.00$<br>$b=64.00$<br>$c=63.61$ |
| Molecules per ASU                                       | 1                                   |
| Mosaicity                                               | 0.28                                |
| Matthews coefficient (Å <sup>3</sup> Da <sup>-1</sup> ) | 2.70                                |
| Solvent content (%)                                     | 54.41                               |
| Max. resolution (Å)                                     | 1.58                                |
| <b>Data collection and processing</b>                   |                                     |
| Space group                                             | $P3_221$                            |

|                                                                          |                        |
|--------------------------------------------------------------------------|------------------------|
| Resolution limits (Å)                                                    | 31.81-1.58 (1.67-1.58) |
| Wavelength (Å)                                                           | 0.8856                 |
| No. of observed reflections                                              | 70218 (10743)          |
| No. of unique reflections                                                | 19704 (2972)           |
| $R_{pim}$                                                                | 0.019(0.025)           |
| $R_{mrgd}$                                                               | 0.036(0.047)           |
| Completeness (%)                                                         | 93.7(98.2)             |
| $\langle I/\sigma \rangle$                                               | 26.7(19.2)             |
| <b>Refinement statistics</b>                                             |                        |
| Resolution (Å)                                                           | 55.43-1.58             |
| Reflections used                                                         | 18627                  |
| $R_{work}$ (%)                                                           | 16.24                  |
| $R_{free}^a$ (%)                                                         | 19.56                  |
| Number of water molecules                                                | 172                    |
| Ramachandran plot <sup>b</sup> :<br>Residues other than Gly and Pro in : |                        |
| Most favored regions (number)                                            | 117                    |
| Additional allowed regions (number))                                     | 4                      |
| Disallowed regions (number)                                              | 0                      |
| PDB code                                                                 | 4AO1                   |

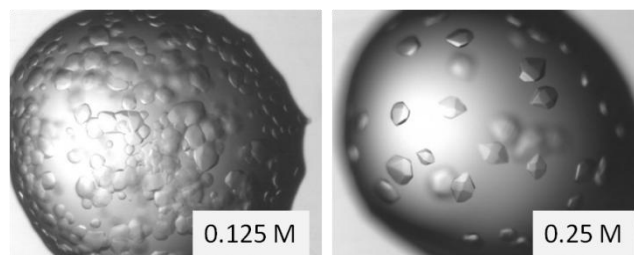

**Fig. S1** Effect of increasing concentration of [Ch][C<sub>2</sub>SO<sub>3</sub>] on RNase crystallization at a given concentration of protein and inorganic precipitants (20 mg/ml and 1/4 reservoir solution, respectively).

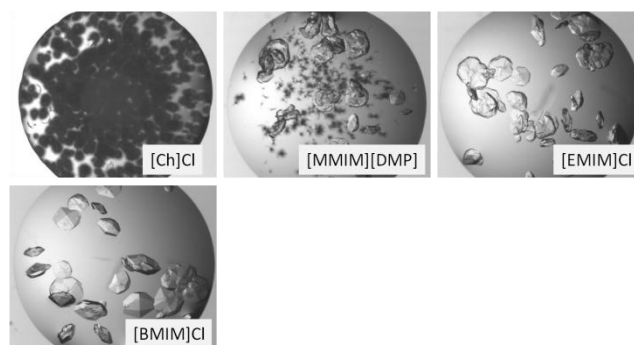

**Fig. S2** Effect of ILs on the crystallization of lysozyme at 0.06 M concentration of the IL. Note that the effect of [MMIM][DMP] is not directly comparable within this series due to change of anion. Nevertheless, the nucleation density of the lysozyme crystals in the presence of [MMIM][DMP] is always lower than in the presence of any [Ch]-based ILs and higher than in the presence of any [EMIM]- or [BMIM]-based IL (irrespective of the anion).

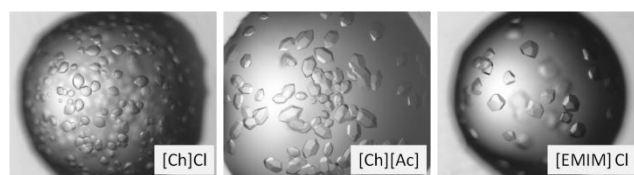

**Fig. S3** Effect at a given concentration (0.25 M) of particular ionic liquids on RNase crystallization (at fixed concentration of the protein and inorganic precipitants, here 20 mg/ml and 1/4 of the reservoir solution).

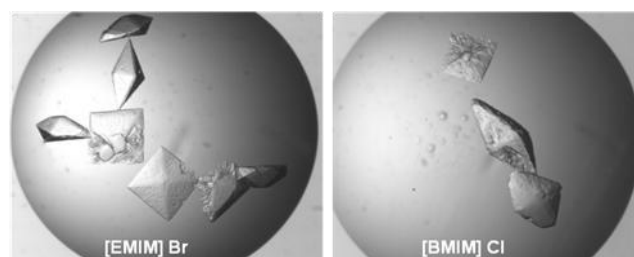

**Fig. S4** Dissolution of the originally regular and smooth lysozyme crystals grown in the presence of 0.25 M of initial concentration of [EMIM]Br and [BMIM]Cl.

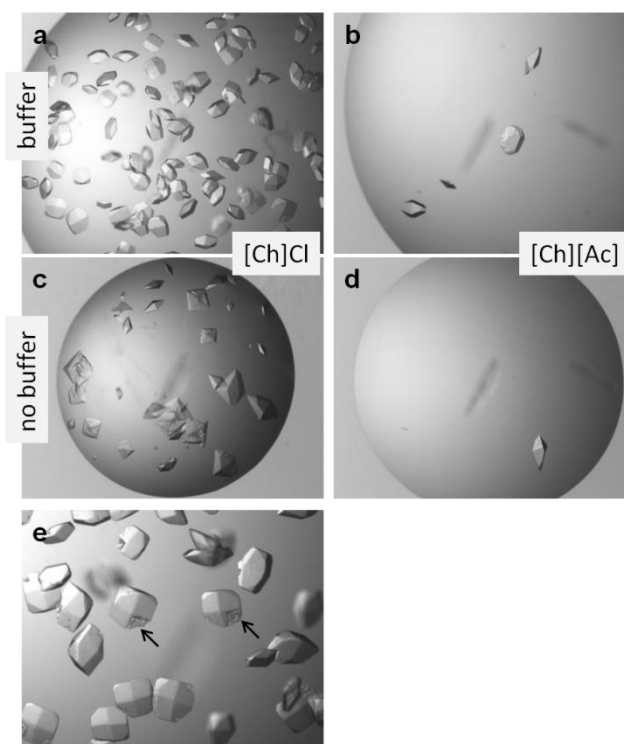

**Fig. S5** Lysozyme crystals grown at 4°C in 1 M solution of a) [Ch]Cl and b) [Ch][Ac] in the presence of 25 mM sodium acetate buffer (pH = 4.57) and in 1 M solution of: c) [Ch]Cl and d) [Ch][Ac] without buffer (in either reservoir or protein solution). Image e) presents the partial dissolution of the crystals grown in a buffered solution of 1 M [Ch]Cl after placing the crystals at 20°C.
